# Supplementary material for: What is the role of smartphones on physical activity promotion? A systematic review and meta-analysis
Source: Springer Nature journal article supplement (doi:10.1007/s00038-019-01210-7), 2019-02-13
Supplement: MOESM1 [file 16468574]

**International Journal of Public Health**

**What is the role of smartphones on physical activity promotion? A systematic review and meta-analysis.**

**Electronic Supplemental Material**

1. Prisma checklist

| **Section/topic** | **#** | **Checklist item** | **Reported on page #** |
| --- | --- | --- | --- |
| **TITLE** | | |  |
| Title | 1 | Identify the report as a systematic review, meta-analysis, or both. | 1 (l.1-2) |
| **ABSTRACT** | | |  |
| Structured summary | 2 | Provide a structured summary including, as applicable: background; objectives; data sources; study eligibility criteria, participants, and interventions; study appraisal and synthesis methods; results; limitations; conclusions and implications of key findings; systematic review registration number. | Separated file |
| **INTRODUCTION** | | |  |
| Rationale | 3 | Describe the rationale for the review in the context of what is already known. | 2 (l.3-7) |
| Objectives | 4 | Provide an explicit statement of questions being addressed with reference to participants, interventions, comparisons, outcomes, and study design (PICOS). | 2 (l.7-8) |
| **METHODS** | | |  |
| Protocol and registration | 5 | Indicate if a review protocol exists, if and where it can be accessed (e.g., Web address), and, if available, provide registration information including registration number. | - |
| Eligibility criteria | 6 | Specify study characteristics (e.g., PICOS, length of follow-up) and report characteristics (e.g., years considered, language, publication status) used as criteria for eligibility, giving rationale. | 3 (l.1-22) |
| Information sources | 7 | Describe all information sources (e.g., databases with dates of coverage, contact with study authors to identify additional studies) in the search and date last searched. | 8 (l.15-17; 27-29) |
| Search | 8 | Present full electronic search strategy for at least one database, including any limits used, such that it could be repeated. | Supplementary file |
| Study selection | 9 | State the process for selecting studies (i.e., screening, eligibility, included in systematic review, and, if applicable, included in the meta-analysis). | 2 (l.14-31) + 3 (l.1) |
| Data collection process | 10 | Describe method of data extraction from reports (e.g., piloted forms, independently, in duplicate) and any processes for obtaining and confirming data from investigators. | 4 (l.5-13) |
| Data items | 11 | List and define all variables for which data were sought (e.g., PICOS, funding sources) and any assumptions and simplifications made. | 3 (l.23-26) + 4 (l.8-13) |
| Risk of bias in individual studies | 12 | Describe methods used for assessing risk of bias of individual studies (including specification of whether this was done at the study or outcome level), and how this information is to be used in any data synthesis. | 3 (l.27-29) + 4 (l.1-5) |
| Summary measures | 13 | State the principal summary measures (e.g., risk ratio, difference in means). | 4 (l.16-17) |
| Synthesis of results | 14 | Describe the methods of handling data and combining results of studies, if done, including measures of consistency (e.g., I2) for each meta-analysis. | 4 (l.16-26) |

Page 1 of 2

| **Section/topic** | **#** | **Checklist item** | **Reported on page #** |
| --- | --- | --- | --- |
| Risk of bias across studies | 15 | Specify any assessment of risk of bias that may affect the cumulative evidence (e.g., publication bias, selective reporting within studies). | 3 (l.27-29) + 4 (l.1-5; 26) |
| Additional analyses | 16 | Describe methods of additional analyses (e.g., sensitivity or subgroup analyses, meta-regression), if done, indicating which were pre-specified. | 4 (l.24-25) |
| **RESULTS** | | |  |
| Study selection | 17 | Give numbers of studies screened, assessed for eligibility, and included in the review, with reasons for exclusions at each stage, ideally with a flow diagram. | 2 (l.3) |
| Study characteristics | 18 | For each study, present characteristics for which data were extracted (e.g., study size, PICOS, follow-up period) and provide the citations. | 2 (l.4-26) |
| Risk of bias within studies | 19 | Present data on risk of bias of each study and, if available, any outcome level assessment (see item 12). | 19-20 (table 2) |
| Results of individual studies | 20 | For all outcomes considered (benefits or harms), present, for each study: (a) simple summary data for each intervention group (b) effect estimates and confidence intervals, ideally with a forest plot. | Table 1; Figure 2; Figure 3; supplementary files |
| Synthesis of results | 21 | Present results of each meta-analysis done, including confidence intervals and measures of consistency. | 20 (l.2-11) + 21 (l.1-2)  Figure 2; Figure 3; |
| Risk of bias across studies | 22 | Present results of any assessment of risk of bias across studies (see Item 15). | 19 (l.1-17) |
| Additional analysis | 23 | Give results of additional analyses, if done (e.g., sensitivity or subgroup analyses, meta-regression [see Item 16]). | 21 (l.7-17) + 22 (l. 1-6) |
| **DISCUSSION** | | |  |
| Summary of evidence | 24 | Summarize the main findings including the strength of evidence for each main outcome; consider their relevance to key groups (e.g., healthcare providers, users, and policy makers). | 22 (l.8-14) |
| Limitations | 25 | Discuss limitations at study and outcome level (e.g., risk of bias), and at review-level (e.g., incomplete retrieval of identified research, reporting bias). | 23 (l. 18-21) |
| Conclusions | 26 | Provide a general interpretation of the results in the context of other evidence, and implications for future research. | 24 (l. 1-7) |
| **FUNDING** | | |  |
| Funding | 27 | Describe sources of funding for the systematic review and other support (e.g., supply of data); role of funders for the systematic review. | - |

*From:*  Moher D, Liberati A, Tetzlaff J, Altman DG, The PRISMA Group (2009). Preferred Reporting Items for Systematic Reviews and Meta-Analyses: The PRISMA Statement. PLoS Med 6(7): e1000097. doi:10.1371/journal.pmed1000097

For more information, visit: **www.prisma-statement.org**.

Page 2 of 2

1. Search strategy

PUBMED

((((“physical exercise”[Title/Abstract]) OR “physical activity”[Title/Abstract]) OR “motor activity”[Title/Abstract])) AND (((((((smartphone[Title/Abstract]) OR “mobile devices”[Title/Abstract]) OR “motion sensor”[Title/Abstract]) OR “cell phone”[Title/ Abstract]) OR app[Title/Abstract]) OR application[Title/Abstract]) OR "mobile phone"[Title/Abstract])

PsycINFO

**Abstract**: “physical exercise” OR “physical activity” OR “motor activity” *AND* **Abstract**: smartphone OR “mobile devices” OR “motion sensor” OR “cell phone” OR app OR application OR “mobile phone”)

SPORT DISCUS

TX ( “physical exercise” OR “physical activity” OR “motor activity” ) AND TX ( smartphone OR “mobile devices” OR “motion sensor” OR “cell phone” OR app OR application OR “mobile phone”)

SCOPUS

( TITLE-ABS-KEY ( "physical exercise" OR "physical activity" OR "motor activity" ) AND TITLE-ABS-KEY (smartphone OR “mobile devices” OR “motion sensor” OR “cell phone” OR app OR application OR “mobile phone”)

LILACS

SCIELO

#1 (ab:("exercício físico")) OR (ab:("atividade física")) OR (ab:("atividade motora"))
#2 (ab:(smartphone)) OR (ab:("telefone celular")) OR (ab:("telefone móvel")) OR (ab:(app)) OR (ab:(aplicativo)) OR (ab:("sensor de movimento")) OR (ab: ("dispositivo móvel"))
#3 #1 AND #2

LILACS

(tw:((tw:("exercício físico")) OR (tw:("atividade física")) OR (tw:("atividade motora")))) AND (tw:((tw:(smartphone)) OR (tw:("dispositivo móvel")) OR (tw: ("telefone celular")) OR (tw:("telefone móvel")) OR (tw:(app)) OR (tw: (aplicativo)) OR (tw:("sensor de movimento"))))

1. Sub-group analysis of interventions that did not use any other form of

feedback instead APP to improve physical activity level in adults.


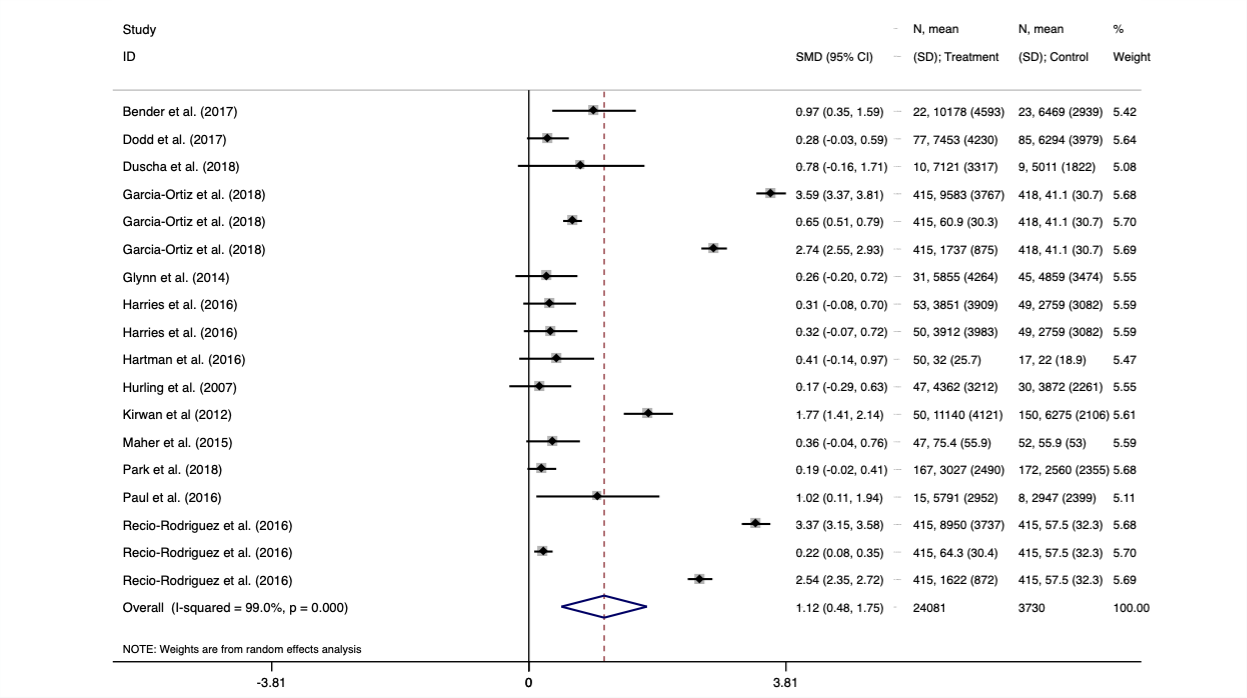


1. Sub-group analysis based on data available from application-based interventions to improve physical activity level in adults from different continents: Americas, Asia, Oceania, and Europe.

**
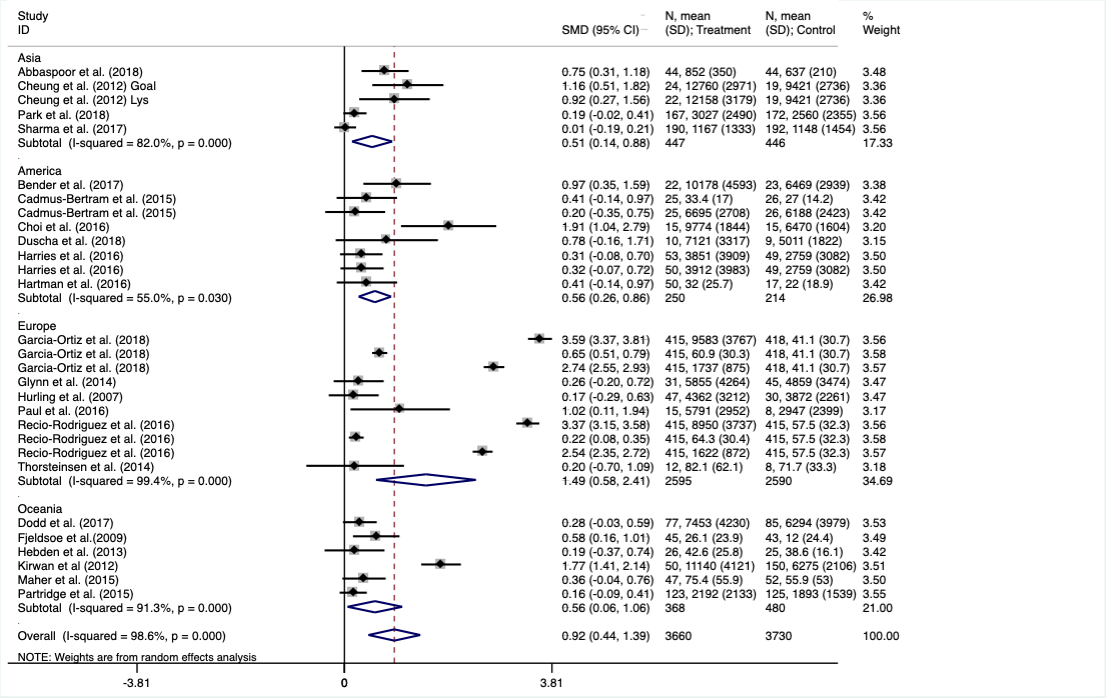
**

1. Characteristics of the intervention studies included in the review.

| **Table 1.** Characteristics of the intervention studies included in the review. | | | | | | | | | |
| --- | --- | --- | --- | --- | --- | --- | --- | --- | --- |
| **Author** | **Country** | **Sample** | **Age** | **Design** | **Intervention** | **Physical activity measurement** | **Study duration/ Delivery agent** | **Key findings** | **Conclusions** |
| Abbaspoor et al. (2018) | Iran (Upper-middle-income) | 100 (pre-diabetic pregnant) | X=28.4 ±3.6 | RCT | Intervention group  Participants received two SMS, every other day, in addition to face-to-face education during the 10 weeks. Authors tried to send one subject during one or maximum two days.  Control group  Face-to-face education session only. | Questionnaire | 10 weeks/ SMS | The levels of weekly PA were not different at the beginning of the study, but at the end of the education period, a significant difference was observed in the PA levels between groups. | The intervention increased PA level. |
| Bender et al. (2017) | USA (high income) | 45 (T2D) | X=58.0 ±10.0 | RCT | Intervention group  Participants used a Fitbit accelerometer, APP with diary for health behavior tracking (steps, food/calories, and weight), and social media for virtual social support, including 7 in-person monthly meetings.  Control group  Waitlist control. | Accelerometer | 3 months/ APP | Overall step counts significantly increased for each study arm that received the intervention compared with control group. | The intervention increased PA level. |
| Blake et al.(2015) | United Kingdom (high income) | 296 (healthy) | X=38.8 ±10.2 | RCT | Intervention group  The sample received messages designed to increase the PA.  Control group  None. | Questionnaire | 12 weeks / SMS + Email | Intervention increased work- and leisure-related MPA, LPA, VPA. Emails promoted PA better than SMS on TPA and MPA. | The intervention increased PA level. |
| Bond et al.(2015) | USA (high income) | 30 (overweight/  obese) | X=47.5 ±13.5 | RCT | Intervention group  Three APP-based interventions to perform (1) 3-min breaks after 30 min SED (2) 6-min breaks after 60 min SED; and (3) 12-min breaks after 120 min SED.  Control group  None. | SenseWear Mini Armband monitor  (accelerometer-like motion sensor) | 3 weeks/ APP | All interventions significant decreases SED and increases in LPA and MVPA (p <0.005). The 3-min-group raised LPA higher than 12 min-group (p <0.05). | The intervention increased PA level. |
| Cadmus-Bertram et al.(2015) | USA (high income) | 51 (overweight / obese postmenopausal women) | X=60 ±7.1 | RCT | Both groups had a goal of 150 min/week MVPA or 10,000 steps.  Intervention group  The intervention group received a FitBit + calls every 4 weeks.  Control group  Received a standard pedometer. | Accelerometer | 16 weeks/ Fitbit + Calls | In relation to baseline, the intervention group increased MVPA (p<0.01), bouts of 10 min MVPA (p=0.008); and steps/day (p=0.01). | The intervention increased PA level. |
| Cheung et al.(2012) | China (Upper-middle-income group) | 88 (healthy) | X=35.4 ±11.6 | RCT | Intervention group  The sample was divided into 4 groups: 1) only pedometer; 2) pedometer + SMS 3x / week, (steps/week goal, solutions to barriers and tips to increase PA); 3) pedometer + SMS 3x / week about healthy lifestyle  Control group  Only SMS about ways to relieve stress. | Pedometer | 12 weeks/ SMS + pedometer | All intervention groups increased steps / day compared to control group (p<0,007). Group 2 and group 3 increased steps / day compared to group 1 (p=0.02). | The intervention increased PA level. |
| Choi et al. (2016) | USA  (high income) | 35 (healthy) | X=33.7 ±2.6 | RCT | Intervention group: specific goal setting, recommendations for gestational weight gain and instructions for promoting PA during pregnancy; used Fitbit app and tracker; daily messages (either SMS or short videos).  Control group  Used only the Fitbit tracker, recommendations  for gestational weight gain and instruction for promoting PA during pregnancy. | Accelerometer; questionnaire | 12 weeks/  APP + SMS | No significant changes in physical activity. | The intervention did not increase PA level. |
| Cowdery et al. 2015 | USA  (high income) | 40 (healthy) | Median= 32.0; IQR: 25, 41.75 | RCT | Intervention group  Use of one of the exergame apps, self- monitoring of physical activity through the MOVES app, weekly motivational emails to increase intrinsic motivation for PA.  Control group  Used only physical activity tracking app (MOVES) | Accelerometer; questionnaire | 12 weeks/ APP + E-mail | No significant changes in physical activity. | The intervention did not increase PA level. |
| Dodd et al. (2017) | Australia (high income) | 162 (pregnant) | X=30.9 ±5.7 | RCT | Intervention group:  Participants received a comprehensive dietary and PA intervention and were additionally provided access to the smartphone application.  Control group:  Received a comprehensive dietary and PA intervention | Questionnaire | 36 weeks/ APP | Overall, baseline physical activity patterns were similar between the two treatment groups. | The intervention did not increase PA level. |
| Duscha et al. (2018) | USA (high income) | 20 (peripheral artery disease) | X=69.4 ±8.4 | RCT | Intervention group  Patients received weekly emails containing information relevant to a PAD patient. Patients received feedback, consultation and were given an opportunity to ask any questions monthly when staff called to adjust patient step prescriptions.  Control group  Usual care. | Pedometer | 12 week / APP + E-mail + Calls | Neither steps per day or minutes of activity reached significant differences between groups. | The intervention did not increase PA level. |
| Fanning et al. (2017) | USA  (high income) | 116 (healthy) | X=41.4 ±7.6 | RCT | Intervention group  (1) a basic self-monitoring APP, (2) the basic APP + goal setting, (3) the basic APP + points-based feedback, or (4) the basic APP + both modules.  Control group  None. | Accelerometer | 12 week/ APP | All individuals increased MVPA by more than 11 daily minutes. Group 3 demonstrated still higher levels of MVPA and more favorable psychosocial and app usage outcomes across the intervention. Group 2 had higher levels of app usage relative to those without the component. | The intervention did increase PA level. |
| Fjeldsoe et al.(2009) | Australia (high income) | 185 (healthy) | X=28 ±6 | RCT | The intervention consisted of: clinical visits to determine PA goals, cell phone calls at week 6 to evaluate this goal, 3-5 SMS per week for each individual.  Control group  None. | Questionnaire | 12 weeks/ SMS + Calls | The intervention group increased with significance PA (p=0.04) and walking as exercise frequency (p=0.02) after 12 weeks. | The intervention increased PA level. |
| Fukuoka et al.(2010) | USA (high income) | 41 (sedentary) | X=48 | RCT | Participants sent total steps by APP. In 2nd and 3rd week, they should increase steps by 20% compared to 1st week. Weekly goals were sent by APP with feedback and motivational messages.  Control group  None. | Pedometer | 3 weeks/ APP + Pedometer | There was an increase of about 800 steps over the 3 weeks (p <0.001). | The intervention increased PA level. |
| Garcia-Ortiz et al. (2018) | Spain (high income) | 833 | X=51.9 ±12.1 | RCT | Intervention group  Participants received training in the use of the APP designed to promote the Mediterranean diet and increase PA over a 3-month period.  Control group  PA and and Mediterranean diet counseling. | Accelerometer;  Questionnaire | 12 months/ APP | PA by accelerometer declined in both groups at 12 months. PA analyzed by 7-day questionnaire did not show changes at 12 months in any of the groups. | The intervention did not improved PA. |
| Gilson et al. (2015) | Australia (high income) | 44 (high risk for chronic disease) | X=32.0 ±10.1 | Pre-post within-subjects design | Intervention components Used the app and received intervention guidance and support by the researchers through connecting via the app  Control group  None | Activity tracker | 20 weeks/ APP | No significant changes in physical activity. | The intervention did not increase PA level. |
| Glynn et al. (2014) | Ireland  (high income) | 139 (primary care patients) | X=44.1 ±11.5 | RCT | Intervention group  PA goal: 10,000 steps/day. Information on benefits of exercise. Smartphone app and instruction on how to use, telephone mentoring sessions.  Control group  PA goal: (walking for 30 min/day + normal activity). Information on benefits of exercise but without APP. | Pedometer | 8 weeks/ APP | Significant between-group increase in mean steps/day in intervention group at 8 week follow-up (1631 ± 3842; p = 0.03). | The intervention did increase PA level. |
| Harries et al. (2016) | USA (high income) | 152 (healthy) | 18 to 40 | RCT | Intervention group  1: individual feedback group (feedback on the participant’s own steps); 2: a social feedback group (feedback on the participant’s own steps and on the average steps taken by others in their group).  Control group  No feedback and no access to the interactive elements of the APP. | Questionnaire | 6 week/ APP | Compared to the control, the expected step-count for the individual feedback group was 60 % higher and that for the social feedback group, 69 % higher. | The intervention increased PA level. |
| Hartman et al.(2016) | USA (high income) | 54 (overweight / obese) | X=59.5 ±5.6 | RCT | Intervention group  Each participant received a FitBit, to send information on PA levels, and recorded eating habits, and 12 30-minute calls.  Control group  Usual care. | Accelerometer | 6 weeks/ APP + Calls | The intervention group increased PA level compared to baseline, but did not achieved same result compared to the control group. | The intervention increased MVPA level. |
| Hebden et al. (2014) | Australia (high income) | 51 (healthy) | X=22.9 ±4.6 | RCT | Intervention group  Used the apps, received SMS text and email messages and internet forums.  Control group  Printed diet booklet with instructions from dietician. | Questionnaire;  Accelerometer | 12 weeks/ APP+ SMS+ E-mail | Intervention increased light intensity activity at  13 week follow-up (34.2 ± 35.1,  p = 0.001). No between group differences for self-reported MET minutes of physical activity. | The intervention did increase PA level. |
| Hurling et al.(2007) | United Kingdom (high income) | 77 (healthy) | X=40.4 ±7.6 | RCT | Intervention group received: solutions to perceived barriers, planning PA with mobile reminders, e-mail, and feedback.  Control group  Received all those tools but feedback. | Questionnaire; Accelerometer | 9 weeks/ APP + e-mail | Intention-to-treat analyzes showed greater MVPA level in the intervention group (p=0.03). | The intervention increased MVPA level. |
| King et al. (2016) | USA (high income) | 95 | X=60.0 ±9.3 | RCT | Intervention groups Analytic app: Two colorful meters showed progress towards goals for MVPA and sedentary behavior.  Social app:  Small avatars reflecting the current PA levels of participant and other members of the “virtual team”, as well as another “virtual team”.  Affect app: avatar to mirror how active or sedentary the user was throughout the day. The avatar changed position, posture, and movement depending on how active or inactive the user was up to that time point.  Control group  Tracks dietary behaviors | Accelerometer;  Questionnaire | 8 week/ APP | Social app users showed significantly greater overall increases in weekly accelerometry-derived MVPA relative to the other three arms | The intervention increased PA level. |
| Kirwan et al.(2012) | Australia (high income) | 200 | X=39.7 ±12.5 | Pre-post within-subjects design | The intervention group sent via APP the number of steps / day along 3 months.  Control group  Matched group without intervention. | Pedometer | 3 months/ APP | The intervention group maintained the PA level after intervention. The control group decreased steps / day (p <0.001). | The intervention did not increase PA level. |
| Maher et al. (2015) | Australia (high income) | 110 (healthy) | X=35.6 ±12.4 | RCT | Intervention group:  Used the app, automated computer- tailored emails to summarise progress and encourage continued participation, use of pedometer to encourage achieve 10,000 steps/day  Control group:  Waitlist control. | Pedometer;  Questionnaire | 8 weeks/ APP + E-mail | Significant between-group increase in mean weekly minutes of overall PA in IG (528 ± 391 vs CG: 391 ± 371, and walking (332 ± 289 vs CG: 160 ± 185)  20-week follow-up: Physical activity remained higher compared to baseline, and higher in IG compared to CG. | The intervention did increase PA level. |
| Mitchell et al. (2018) | Canada (high income) | 32,229 | X=33.7 ±11.6 | Pre-post within-subjects design | Intervention group  Participants earned incentives in the form of loyalty points (worth Can $0.04 ) every day they reached their personalized daily step goal. Participants earned additional points (Can $0.40) for meeting their step goal 10+ nonconsecutive times in a 14-day period. They could earn up to Can $5.00 during the 12-week evaluation period.  Control group  None. | Built-in smartphone accelerometer | 12 weeks/APP | Results revealed statistically significant increases in mean daily step counts when comparing baseline with each study week (*P*<.001). Compared with baseline, participants walked 115.70 more steps (at study week 12. | The intervention did increase PA level. |
| Naimark et al.(2015) | Israel (high income) | 85 (healthy) | X=47.9 ±12.3 | RCT | Intervention group Received APP and were instructed to use it as much as they wanted.  Control group  Instructed to maintain a healthy lifestyle. | Questionnaire | 14 weeks/ APP | The APP group improved PA level higher than control group (p = 0.03). | The intervention increased PA level. |
| Nguyen et al.(2009) | USA (high income) | 43 (COPD) | X=68 ±11 | RCT | Intervention group  Group 1 received a goal of 150 min/ week MVPA + exercise guide + pedometer. Sample should send SMS to researchers when performing some PA and received feedback on PA. Group 2 reported daily PA but did not receive the feedback.  Control group  None. | Accelerometer | 6 weeks/ SMS + Calls | The group (2) increased number of steps / day compared to group (2). | The intervention increased PA level. |
| Ormel et al. (2018) | Netherlands (high income) | 32  (Cancer) | X=33.6 ±11.2 | RCT | Intervention group  Patients received a brief user’s guide for APP use and were instructed to selfmonitor PA  Control group  Usual care | Questionnaire | 12 weeks/ APP | APP use resulted in an increase in PA after 6 weeks. | The intervention increased PA level. |
| Park et al. (2018) | South Korea (high income) | 356 (breast cancer) | X=50.4 ±9.5 | RCT | Intervention group  Weekly goal of PA and achievement rate were displayed on the APP. It also provided video clips of prescribed exercises, and the participants were instructed to enter the number of exercise sets they performed. The participants enter the activity and exercise performed daily during the intervention period.  Control group  Exercise education only. | Questionnaire | 12 week / APP | After intervention, physical activity was increased from 2315.5 ± 3513.2 MET min/week to 3466.2 ± 4712.5 MET min/week. | The intervention increased PA level. |
| Partridge et al. (2015) | Australia (high income) | 250 (healthy) | X=27.7 ±4.9 | RCT | Intervention group  APP; received eight SMS and 1 e-mail weekly, five personalized coaching calls, a diet booklet and access to resources and four apps via a website.  Control group  Introductory call at week 0, 4 SMS in total, and printed dietary and physical activity guidelines. | Questionnaire | 12 weeks/  APP + SMS + E-mail + Calls | At 12 weeks, significant between- group increase in total physical activity by 1.3 days/week (95% CI: 0.5–2.2, P = 0.003) in intervention group compared to control group. No significant between- group difference at 9 months follow-up. | The intervention increased PA level. |
| Paul et al. (2016) | United Kingdom (high income) | 23 (stroke) | X=56.0 ±10.0 | RCT | Intervention group  Participants used the APP, received individualized steps goal, and individual and group “rewards” for achieving goals.  Control group  Usual care. | Accelerometer | 6 weeks/ APP | The average daily step count increased by 39.3% (4158 to 5791 steps/day) in the intervention group. | The intervention increased PA level. |
| Rabbi et al. (2015) | USA  (high income) | 17  (healthy) | X=28.3 ±6.9 | RCT | Intervention group  Used the app, received ‘tailored’ suggestions for exercise and food intake via the app;  Control group  Used the app; received ‘generic’ prescriptive recommendations for PA and dietary intake created by health professionals and delivered via the app; | Daily diary | 3 weeks/ APP | No significant changes in physical ativity. | The intervention did not increase PA level. |
| Recio-Rodriguez et al. (2016) | Spain (high income) | 833 | X=51.9 ±12.1 | RCT | Intervention group  Participants received training in the use of the APP designed to promote the Mediterranean diet and increase PA over a 3-month period.  Control group  PA and and Mediterranean diet counseling. | Accelerometer;  Questionnaire | 3 months/ APP | MVPA by questionnaire increased in the intervention group but not in the control group. No differences in increase of activity were found between the two groups. The accelerometer recorded a decrease in PA in both groups. | The intervention improved PA. |
| Rospo et al.(2016) | USA (high income) | 33 (healthy) | X=43.3 | Pre-post within-subjects design | Intervention group  Three groups: (1) APP-prescribed daily goal (10,000 steps); (2) APP following a HR-based program; 3) supervised HR-based program  Control group  None. | Pedometer | 2 weeks/ APP | All three groups improved PA, SBP, DBP, and steps / day. | The intervention improved PA and steps / day. |
| Sharma et al. (2017) | India (lower-middle income) | 400 | 18 to 64 | Pre-post within-subjects design | Intervention group  Weekly text messages and monthly telephone calls addressing lifestyle modification for risk factors of NCDs.  Control group  No access to intervention. | Questionnaire | 12 months / SMS + Calls | PA increased from an average of 1105.8 to 1166.5 MET-min per week in the intervention group. This amounts to an increase of approximately 15 minutes of moderate activity per week. No statistically significant change in PA was found in control group. | The intervention did increase PA level. |
| Stephens  et al. (2017) | USA (high income) | 62 | Median: 20; range: 18-25 | RCT | Intervention group  APP + health coach intervention and counseling sessions  Control group  Counseling session. | Questionnaire | 3 months / APP + SMS | Both groups improved overall physical activity performed (p<0.01), however, the differences were not significant when compared to the control group. | The intervention did not increase PA level. |
| Stuckey et al. (2011) | Canada (high income) | 26 | X=56.6 ±6.9 | Pre-post within-subjects design | Intervention group App + tailored counselling (every 4 weeks) regarding PA and lifestyle modifications with personal goal setting. Participants received a stage-matched activity booklet addressing self-efficacy, decisional balance, and stage- appropriate processes of change. Control group None | Pedometer | 8 weeks/ APP | Significant increase in steps/day in IG at 8-week follow-up (+1,086 ± 1613, p = 0.003). | The intervention did increase PA level. |
| Suggs et al.(2013) | United Kingdom  (high income) | 158 (healthy) | X=39.5 ±11.8 | RCT | Intervention group  The sample was divided into 2 groups. Both groups received e-mails with motivational messages about PA. Only the group 2 received SMS with reminders to reinforce e-mail messages.  Control group  None. | Questionnaire | 12 weeks/ SMS + E-mail | The group that received e-mail + SMS reported a linear decrease in work-related PA. | The intervention decreased work-related PA level. |
| Thorsteinsen et al.(2014) | Norway (high income) | 21 (healthy) | X=55.3 ±11.2 | RCT | Intervention group received SMS about healthy lifestyle and recorded PA on a website so sample could monitor their own PA levels.  Control group  No access to intervention. | Eletronic form | 12 weeks/ SMS + *Website* | Intervention group augmented PA compared to control group. No significant difference was observed at week 12. | The intervention increased PA levels at weeks 5 and 9, but no difference was observed at the end of intervention. |
| van Drongelen et al. (2014) | Netherlands  (high income) | 502 (healthy) | X=40.9 ±8.4 | RCT | Intervention group The MORE Energy app + a website containing more background information was developed alongside the smartphone app. Control group minimal intervention consisting of access to a secure part of the project website, which contained basic, non-tailored, fatigue and health- related information that was already available within the airline company. | Questionnaire | 6 months/ APP | Significant between-group increase in vigorous physical activity in IG at 6-months follow-up (β = 0.17, p = 0.028) | The intervention did increase PA level. |
| Walsh et al. (2016) | Ireland (high income) | 55 | X=20.5 ±2.1 | RCT | Intervention group Given a walking goal of 10,000 steps/day and information related to the benefits of exercise; instructed to use the app to achieve and monitor the goal Control group: Given a walking goal of 30 min a day and information related to the benefits of exercise | App-in Pedometer | 5 weeks / APP | Significant between-group improvements in app intervention group (p=0.043); significantly higher increase in steps in app intervention group (2393) compared to control group (1101) | The intervention did increase PA level. |
| Wang et al.(2016) | USA (high income) | 67 (overweight/ obese) | X=48.2 ±11.7 | RCT | Intervention group  Two groups: 1) group with motion sensor (Fitbit One) + SMS; 2) group with motion sensor only.  Control group  None. | Accelerometer | 6 weeks / SMS + Fitbit | Those who used the Fitbit mobile APP reported an increase in steps per day (p=0.04) against those who did not had. | The intervention increased PA level. |

1. Level of Evidence and methodological quality evaluation of the studies included in this systematic review.

| **Table 2.** Level of Evidence and methodological quality evaluation of the studies included in this systematic review. | | | | | | | | | |
| --- | --- | --- | --- | --- | --- | --- | --- | --- | --- |
| Articles | Level of Evidence | Downs and Black scale | | | | | | |
| Reporting (maximum score =10) | External validity (maximum score =3) | Bias (maximum score =7) | Confounders (maximum score =7) | Power (maximum score =5) | Total score (maximum score=32) |
| Abbaspo et al. (2018) | 1b | 9/10 | 3/3 | 5/7 | 4/7 | 5/5 | 26/32 |
| Bender et al. (2017) | 1b | 8/10 | 3/3 | 5/7 | 6/7 | 0/5 | 22/32 |
| Blake et al.(2015) | 2b | 9/10 | 3/3 | 6/7 | 4/7 | 5/5 | 27/32 |
| Bond et al.(2015) | 1b | 8/10 | 1/3 | 5/7 | 4/7 | 0/5 | 18/32 |
| Cadmus-Bertram et al.(2015) | 1b | 5/10 | 0/3 | 5/7 | 3/7 | 0/5 | 13/32 |
| Cheung et al.(2012) | 2b | 8/10 | 2/3 | 5/7 | 5/7 | 0/5 | 20/32 |
| Choi et al. (2016) | 2b | 9/10 | 2/3 | 5/7 | 5/7 | 0/5 | 21/32 |
| Cowdery et al. (2015) | 1b | 8/10 | 3/3 | 5/7 | 4/7 | 1/5 | 21/32 |
| Dodd et al. (2017) | 2b | 8/10 | 3/3 | 5/7 | 5/7 | 5/5 | 26/32 |
| Duscha et al. (2018) | 2b | 8/10 | 3/3 | 5/7 | 5/7 | 1/5 | 22/32 |
| Fanning et al. (2017) | 1b | 8/10 | 3/3 | 5/7 | 6/7 | 5/5 | 27/32 |
| Fjeldsoe et al.(2009) | 1b | 6/10 | 1/3 | 6/7 | 5/7 | 0/5 | 18/32 |
| Fukuoka et al.(2010) | 2b | 7/10 | 2/3 | 5/7 | 4/7 | 0/5 | 18/32 |
| Garcia-Ortiz et al. (2018) | 1b | 8/10 | 3/3 | 5/7 | 6/7 | 5/5 | 27/32 |
| Gilson et al. (2015) | 2b | 8/10 | 3/3 | 4/7 | 3/7 | 0/5 | 18/32 |
| Glynn et al. (2014) | 1b | 8/10 | 3/3 | 7/7 | 6/7 | 5/5 | 29/32 |
| Harries et al. (2016) | 1b | 9/10 | 3/3 | 7/7 | 5/7 | 0/5 | 24/32 |
| Hartman et al.(2016) | 2b | 7/10 | 2/3 | 5/7 | 5/7 | 0/5 | 19/32 |
| Hebden et al. (2013) | 1b | 9/10 | 3/3 | 6/7 | 6/7 | 1/5 | 25/32 |
| Hurling et al.(2007) | 1b | 8/10 | 3/3 | 5/7 | 4/7 | 0/5 | 20/27 |
| King et al. (2016) | 1b | 9/10 | 3/3 | 5/7 | 6/7 | 1/5 | 24/32 |
| King et al.(2008) | 1b | 6/10 | 1/3 | 4/7 | 4/7 | 0/5 | 15/32 |
| Kirwan et al.(2012) | 2b | 6/10 | 3/3 | 4/7 | 6/7 | 0/5 | 19/32 |
| Maher et al. (2015) | 1b | 9/10 | 3/3 | 6/7 | 5/7 | 5/5 | 28/32 |
| Mitchell et al. (2018) | 2b | 8/10 | 3/3 | 4/7 | 4/7 | 0/5 | 19/32 |
| Naimark et al. (2015) | 1b | 9/10 | 3/3 | 5/7 | 6/7 | 5/5 | 28/32 |
| Naimark et al.(2015) | 1b | 8/10 | 2/3 | 5/7 | 5/7 | 0/5 | 20/32 |
| Nguyen et al.(2009) | 2b | 8/10 | 2/3 | 5/7 | 5/7 | 0/5 | 20/32 |
| Ormel et al. (2018) | 1b | 10/10 | 3/3 | 5/7 | 5/7 | 0/5 | 23/32 |
| Park et al. (2018) | 2b | 7/10 | 3/3 | 5/7 | 3/7 | 2/5 | 20/32 |
| Partridge et al. (2015) | 1b | 7/10 | 3/3 | 7/7 | 3/7 | 2/5 | 22/32 |
| Paul et al. (2016) | 2b | 7/10 | 3/3 | 5/7 | 2/7 | 0/5 | 17/32 |
| Prez-Cruzado et al. (2017) | 2b | 3/10 | 3/3 | 4/7 | 4/7 | 0/5 | 14/32 |
| Rabbi et al. (2015) | 1b | 8/10 | 3/3 | 6/7 | 4/7 | 0/5 | 21/32 |
| Recio-Rodriguez et al. (2016) | 1b | 8/10 | 3/3 | 6/7 | 4/7 | 5/5 | 26/32 |
| Rospo et al.(2016) | 2b | 8/10 | 2/3 | 5/7 | 5/7 | 0/5 | 20/32 |
| Sharna et al. (2017) | 2b | 8/10 | 3/3 | 5/7 | 2/7 | 5/5 | 23/32 |
| Stephens et al. (2017) | 1b | 8/10 | 3/3 | 5/7 | 6/7 | 3/5 | 25/32 |
| Stuckey et al. (2011) | 2b | 8/10 | 3/3 | 5/7 | 2/7 | 0/5 | 18/32 |
| Suggs et al.(2013) | 2b | 8/10 | 1/3 | 5/7 | 5/7 | 0/5 | 19/32 |
| Thorsteinsen et al.(2014) | 2b | 8/10 | 1/3 | 7/7 | 4/7 | 0/5 | 20/32 |
| van Drongelen (2014) | 2b | 8/10 | 3/3 | 5/7 | 6/7 | 5/5 | 27/32 |
| Walsh et al. (2016) | 2b | 8/10 | 3/3 | 7/7 | 6/7 | 5/5 | 29/32 |
| Wang et al.(2016) | 1b | 7/10 | 1/3 | 5/7 | 4/7 | 0/5 | 17/32 |
